# Supplementary material for: A novel mediatorless microbial fuel cell based on direct biocatalysis of Escherichia coli
Source: Royal Society of Chemistry journal article supplement (doi:10.1039/b600876c), 2006-01-01
Supplement: b600876c.pdf [file b600876c.pdf]

## A Novel Mediatorless Microbial Fuel Cell Based on Direct Biocatalysis of *Escherichia Coli*

Tian Zhang, Changzheng Cui, Shengli Chen,\* Xinping Ai, Hanxi Yang, Ping Shen and Zhenrong Peng

### A. The details about the fabrication of fuel cell electrodes

To prepare the composite anode, certain amount of fine graphite particles (5 $\mu\text{m}$  in diameter) and PTFE emulsion were mixed thoroughly to form a paste, which was then pressed on a roller press to form a film of about 150 $\mu\text{m}$ . The optimized content of the PTFE in the composite anode was found to be around 20%(w/w). The cathode was constructed by hot-pressing a gas diffusion film onto a piece of PEM (Nafion 111, Dupont) with one side coated by 20 wt.% Pt/C catalysts (Pt loading: 0.2mg cm<sup>-2</sup>). The anode chamber was a cylindrical cavity of 3cm in length and 1.8cm in diameter made from an organic glass rod. The geometric area of the anode contacted with the solution is 2.54 cm<sup>2</sup>. The fuel cell was discharged at 33°C under constant-load mode by connecting the anode and cathode with a resistor(1.98K $\Omega$ ). A PEM strip was used to connect the anode chamber and a phosphate buffer (100mM, pH 7) solution in which a saturated calomel electrode (SCE) is immersed. The anode potential can thus be measured. Combining the anode potential and the cell voltage gives the corresponding cathode potential.

### B. The linear voltammetric curves

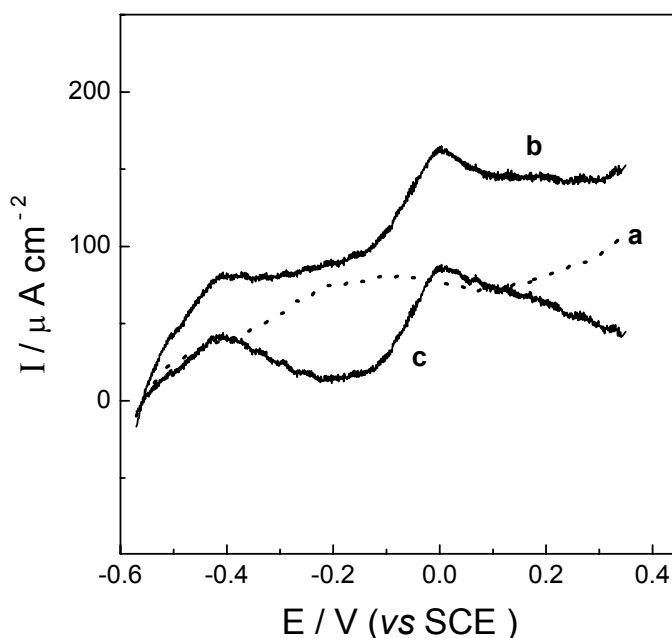

The current-potential curves obtained on a graphite-PTFE composite film electrode supported on glass carbon during the positive-going linear potential scan in (a) blank medium and (b) the culture of the electrochemical *E. coli* of generation II. The experiment was carried out at 33°C with potential scan rates of 10mV s<sup>-1</sup>. The curve (c) is obtained by subtracting of curve (b) with curve (a).

In the blank medium, the current-potential curve shows a broad oxidation peak with very low current in the potential region from  $-0.35\text{V}$  to  $0.0\text{V}$ , characterizing the oxidation of graphite in the buffer solution. This implies that the graphite has very poor catalytic activity toward the glucose oxidation. In the presence of the *E. coli*, however, evident increase in the oxidation current occurs accompanying the positive shift of potential, indicating that the *E. coli* can catalytically oxidize the glucose and transfer the electrons to the working electrode. The curve (c) should represent the current due to *E. coli* catalyzed oxidation of glucose. It can be seen that two separated oxidation peaks are seen on this curve.
